# Supplementary material for: Modulation of the Antibiotic Activity by the Mauritia flexuosa (Buriti) Fixed Oil against Methicillin-Resistant Staphylococcus Aureus (MRSA) and Other Multidrug-Resistant (MDR) Bacterial Strains
Source: PubMed Central journal article supplement (PMC6313460; doi:10.3390/pathogens7040098), 2018-12-10
Supplement: pathogens-07-00098-s001.pdf [file pathogens-07-00098-s001.pdf]

Informações - CG/EM

Analista: Fábio  
Nome da Amostra: ErlanioBuriti\_CHCl3  
Volume de Injeção: 1 uL  
Método: C:\GCMSsolution\Data\Project1\LPPN\Óleo Fixo.qgm  
Tuning: C:\GCMSsolution\System\Tune1\07-02-17.qgt  
Data: 7/2/2017

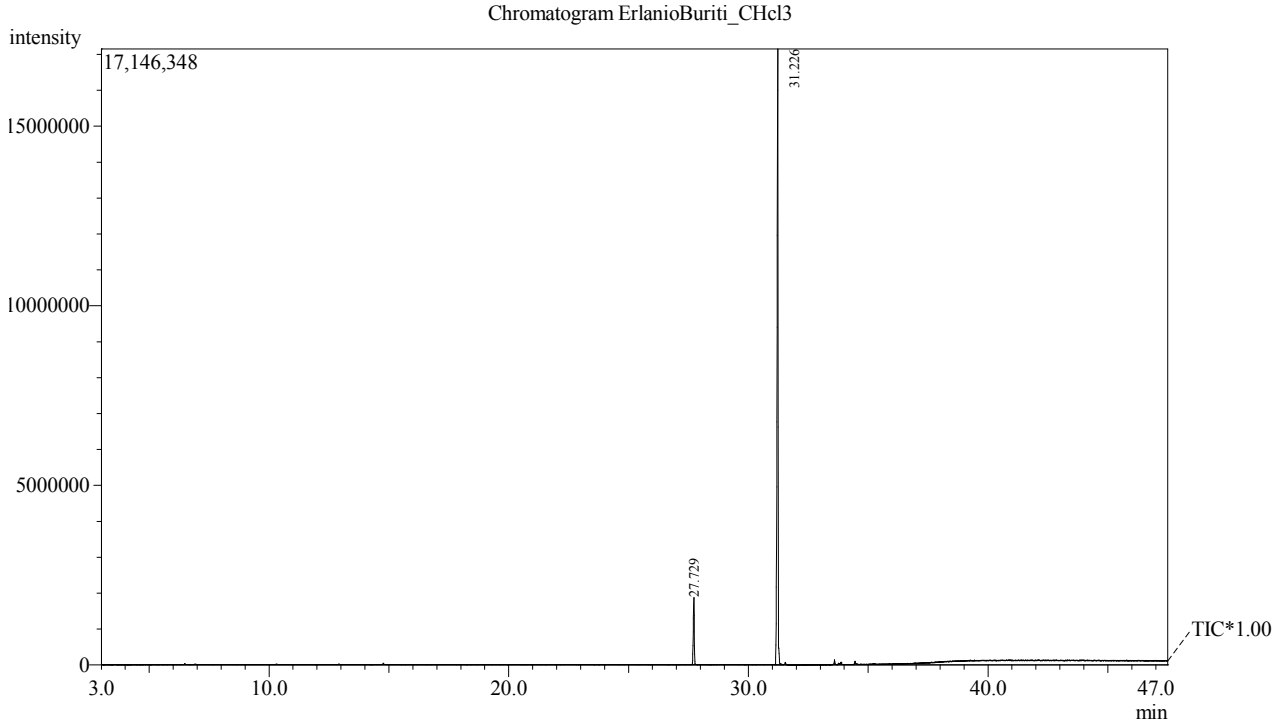

==== Analytical Line 1 =====

[GC-2010]  
Column Oven Temp. :80.0 °C  
Injection Temp. :280.00 °C  
Injection Mode :Split  
Pressure :65.2 kPa  
Total Flow :54.0 mL/min  
Column Flow :1.00 mL/min  
Linear Velocity :36.8 cm/sec  
Split Ratio :50.0  
Oven Temp. Program  
Rate Temperature(°C)  
- 80.0  
5.00 180.0  
10.00 300.0

\$If\$(3.0!=)Equilibrium Time :3.0 min

[GC Program]

==== Analytical Line 1 =====

[GCMS-QP2010]  
[MS Table]  
--Group 1 - Event 1--  
Start Time :3.00min  
End Time :47.50min  
ACQ Mode :Scan  
Event Time :0.50sec  
Scan Speed :1111  
Start m/z :43.00  
End m/z :550.00  
Sample Inlet Unit :GC

==== Analytical Line 1 =====

[GCMS-QP2010]  
IonSourceTemp :200.00 °C  
\$If\$(280.00!=)Interface Temp. :280.00 °C  
(2.50!=)Solvent Cut Time :2.50 min

Peak Report TIC

| Peak# | R.Time | Area     | Area%  | Height   | A/H  | Mark | Name | Base m/z |
|-------|--------|----------|--------|----------|------|------|------|----------|
| 1     | 27.729 | 5582888  | 10.19  | 1865235  | 2.99 |      |      | 74.00    |
| 2     | 31.226 | 49230099 | 89.81  | 17138516 | 2.87 | V    |      | 55.05    |
|       |        | 54812987 | 100.00 | 19003751 |      |      |      |          |

Library

<< Target >>

Line#:1 R.Time:27.725(Scan#:2968) MassPeaks:92  
RawMode:Averaged 27.717-27.733(2967-2969) BasePeak:74.00(394206)  
BG Mode:Calc. from Peak Group 1 - Event 1

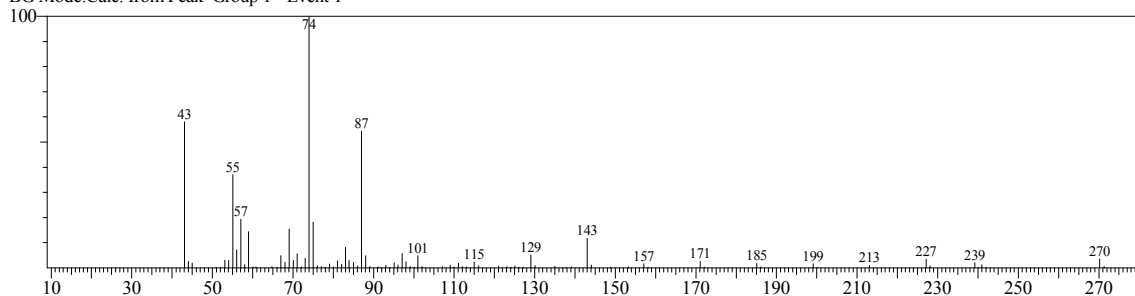

Hit#:1 Entry:90720 Library:NIST08.LIB  
SI:95 Formula:C17H34O2 CAS:5129-60-2 MolWeight:270 RetIndex:1814  
CompName:Pentadecanoic acid, 14-methyl-, methyl ester \$\$ Methyl 14-methylpentadecanoate # \$\$

Hit#:2 Entry:22754 Library:NIST08s.LIB  
SI:94 Formula:C17H34O2 CAS:112-39-0 MolWeight:270 RetIndex:1878  
CompName:Hexadecanoic acid, methyl ester \$\$ Palmitic acid, methyl ester \$\$ n-Hexadecanoic acid methyl ester \$\$ Metholene 2216 \$\$ Methyl hexadecanoic acid methyl ester

Hit#:3 Entry:100813 Library:NIST08.LIB  
SI:93 Formula:C18H36O2 CAS:6929-04-0 MolWeight:284 RetIndex:1914  
CompName:Hexadecanoic acid, 15-methyl-, methyl ester \$\$ Methyl isoheptadecanoate \$\$ Methyl 15-methylhexadecanoate \$\$

Hit#:4 Entry:70951 Library:NIST08.LIB  
SI:92 Formula:C15H30O2 CAS:5129-58-8 MolWeight:242 RetIndex:1615  
CompName:Tridecanoic acid, 12-methyl-, methyl ester \$\$ Methyl isomyristate \$\$ Methyl 12-methyltridecanoate \$\$

Hit#:5 Entry:19697 Library:NIST08s.LIB  
SI:92 Formula:C14H28O2 CAS:1731-88-0 MolWeight:228 RetIndex:1580  
CompName:Tridecanoic acid, methyl ester \$\$ Methyl tridecanoate \$\$ n-Tridecanoic acid methyl ester \$\$ Methyl ester of tridecanoic acid \$\$

<< Target >>

Line#:2 R.Time:31.225(Scan#:3388) MassPeaks:193  
RawMode:Averaged 31.217-31.233(3387-3389) BasePeak:55.05(1702177)  
BG Mode:Calc. from Peak Group 1 - Event 1

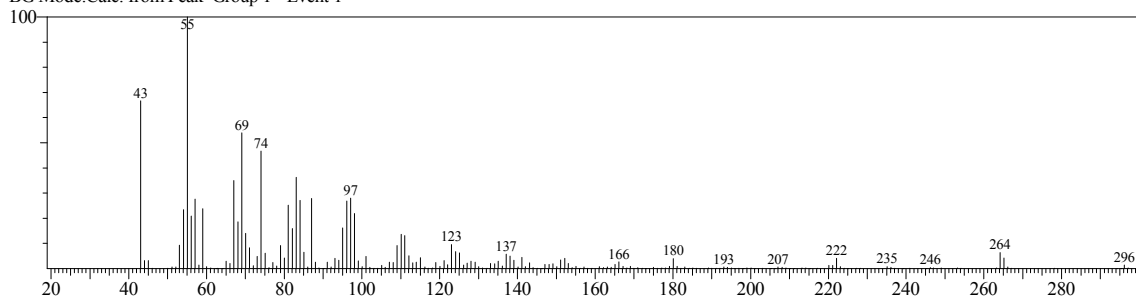

Hit#:1 Entry:24158 Library:NIST08s.LIB  
SI:95 Formula:C19H36O2 CAS:112-62-9 MolWeight:296 RetIndex:2085  
CompName:9-Octadecenoic acid (Z)-, methyl ester \$\$ Oleic acid, methyl ester \$\$ Emery oleic acid ester 2301 \$\$ Methyl cis-9-octadecenoate \$\$ Methyl oleate

Hit#:2 Entry:109248 Library:NIST08.LIB  
SI:94 Formula:C19H36O2 CAS:13481-95-3 MolWeight:296 RetIndex:2085  
CompName:10-Octadecenoic acid, methyl ester \$\$ Methyl (10E)-10-octadecenoate # \$\$

Hit#:3 Entry:24156 Library:NIST08s.LIB  
SI:94 Formula:C19H36O2 CAS:1937-62-8 MolWeight:296 RetIndex:2085  
CompName:9-Octadecenoic acid, methyl ester, (E)- \$\$ Elaidic acid, methyl ester \$\$ Methyl elaidate \$\$ Methyl trans-9-octadecenoate \$\$ (E)-9-Octadecenoic acid methyl ester

Hit#:4 Entry:109241 Library:NIST08.LIB  
SI:93 Formula:C19H36O2 CAS:52380-33-3 MolWeight:296 RetIndex:2085  
CompName:11-Octadecenoic acid, methyl ester \$\$ Methyl 11-octadecenoate \$\$ Octadec-11-enoic acid, methyl ester \$\$ Methyl (11E)-11-octadecenoate # \$\$

Hit#:5 Entry:109250 Library:NIST08.LIB  
SI:93 Formula:C19H36O2 CAS:56554-47-3 MolWeight:296 RetIndex:2085  
CompName:13-Octadecenoic acid, methyl ester \$\$ Methyl (13E)-13-octadecenoate # \$\$
